# Supplementary material
Source: PubMed Central journal article supplement (PMC4972256)
Supplement: supp_pp.15.00972_PP2015-00972R3_Supplemental_Material_Fig_1.pdf [file supp_pp.15.00972_PP2015-00972R3_Supplemental_Material_Fig_1.pdf]

**A**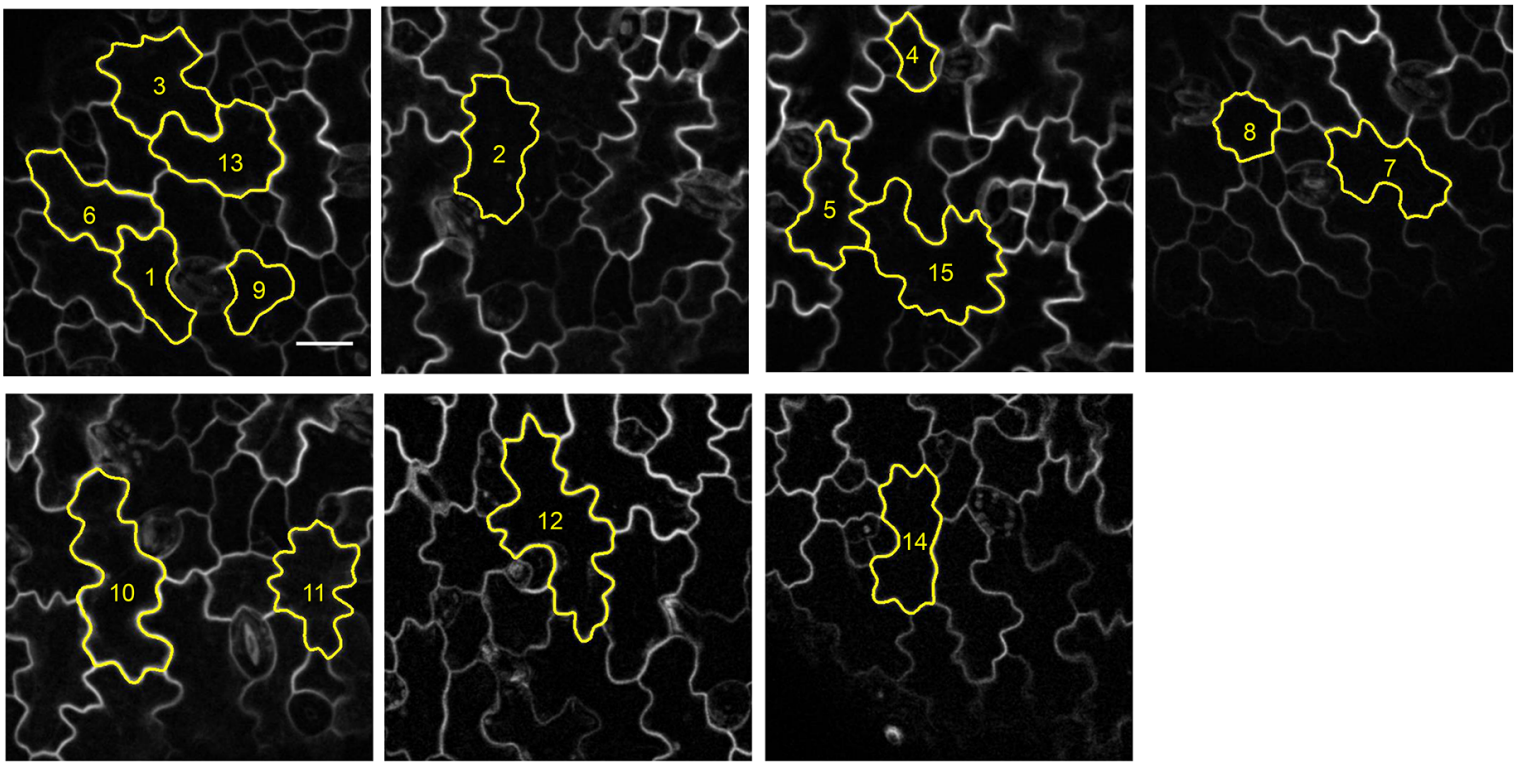**B**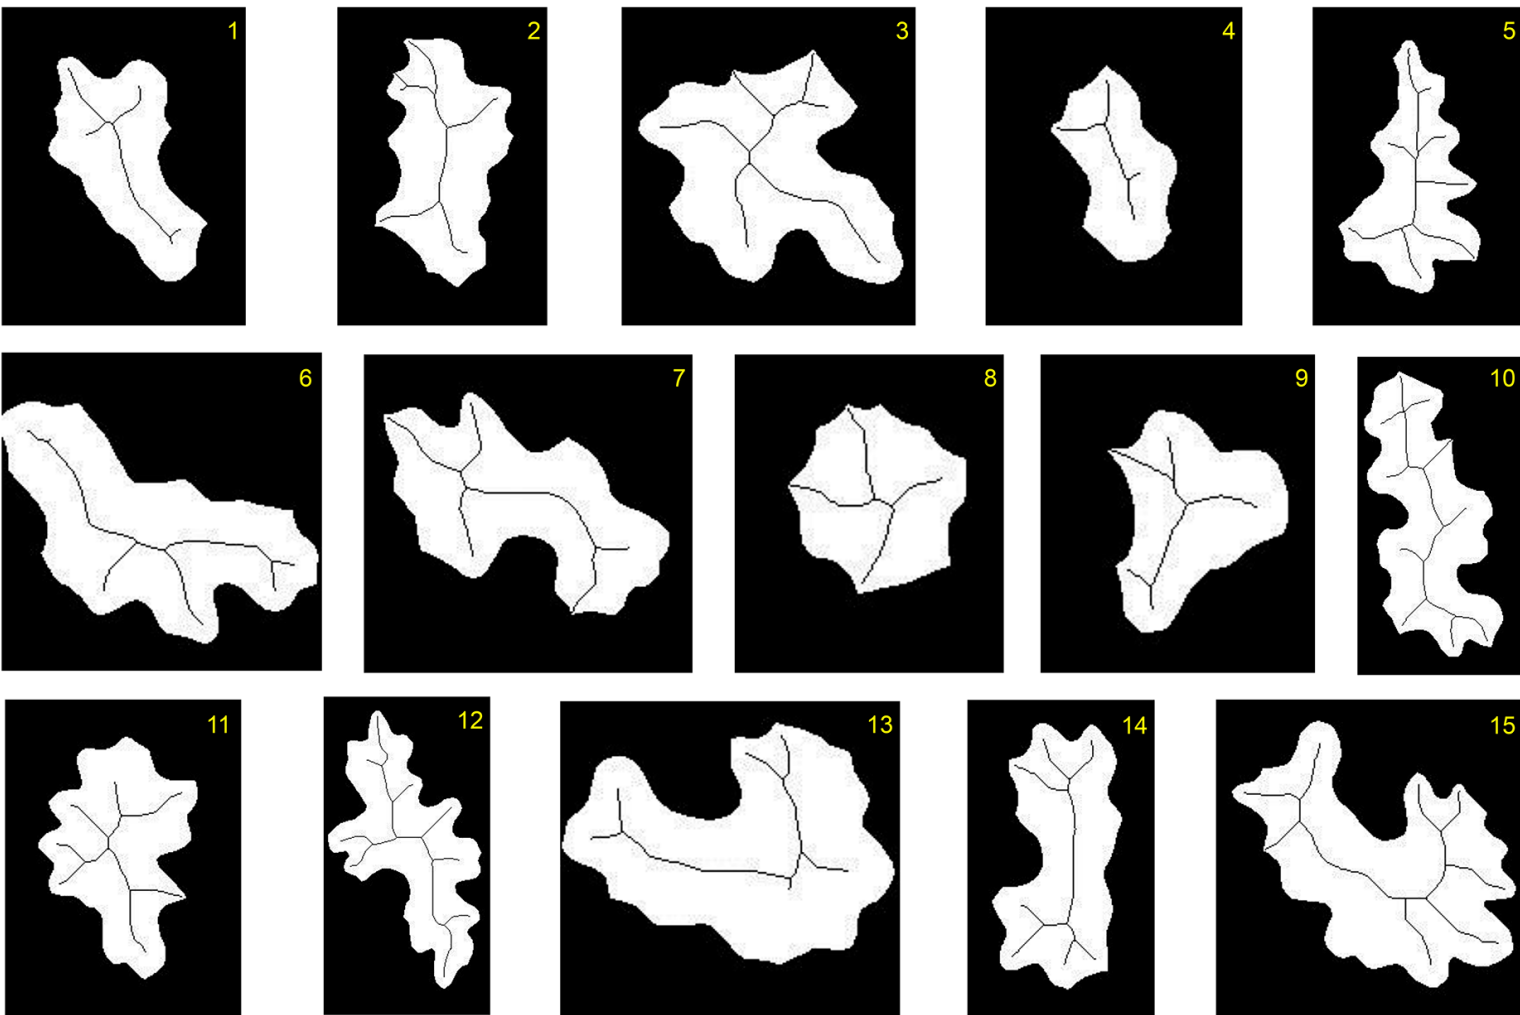

**Supplemental Figure S1.** Examples of raw confocal images of pavement cells and skeletonization results for the 15 cells that were used to validate LobeFinder.

**(A)** Raw images of epidermal cells. The cells segmented in yellow were used as the training set.

**(B)** Skeletonization results for the 15 test cells. Scale bar, 20 $\mu$ m.
