# Supplementary material
Source: PubMed Central journal article supplement (PMC4972256)
Supplement: supp_pp.15.00972_PP2015-00972R3_Supplemental_Material_Fig_2.pdf [file supp_pp.15.00972_PP2015-00972R3_Supplemental_Material_Fig_2.pdf]

# A Sensitivity and performance of lobe identification

$$|\theta - \theta_1| \leq 2\pi \cdot 0.025 \quad \text{True Positive (TP)}$$

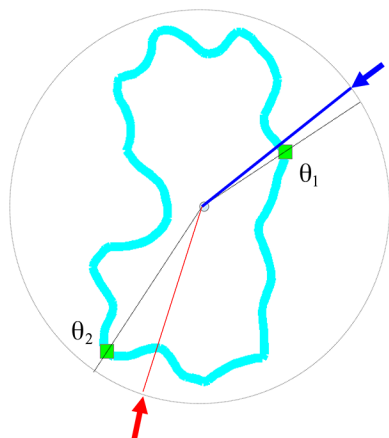

|          | Lobe | Not Lobe |
|----------|------|----------|
| Positive | TP   | FP       |
| Negative | FN   | TN       |

$$\text{Sensitivity} = \text{TP} / (\text{TP} + \text{FN})$$

$$\text{FDR} = \text{FP} / (\text{TP} + \text{FP})$$

$$|\theta - \theta_2| > 2\pi \cdot 0.025 \quad \text{False Positive (FP)}$$

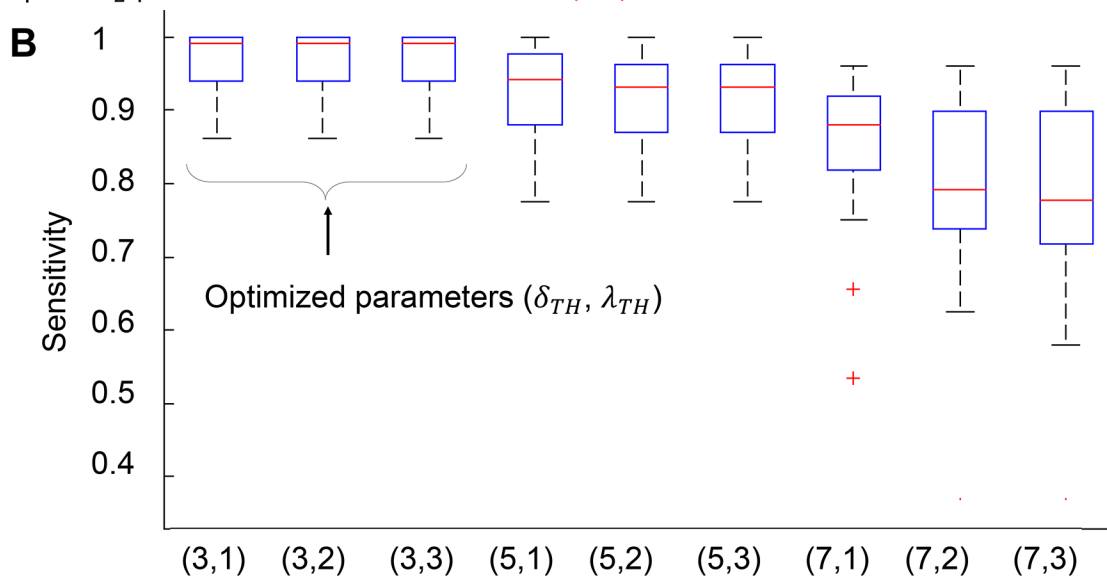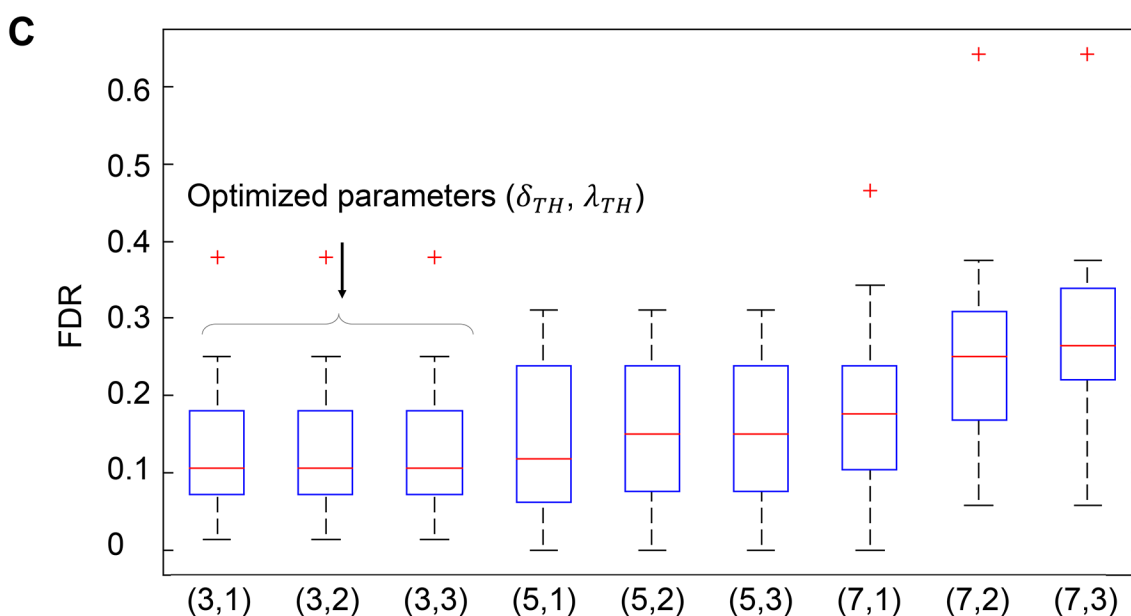

**Supplemental Figure S2. Sensitivity and accuracy analysis of LobeFinder performance.**

**(A)** Definitions of sensitivity and False Discovery Rate (FDR).

**(B)** Sensitivity of LobeFinder outputs over a range of parameter values.

**(C)** FDR of LobeFinder outputs over a range of parameter values.
