# Supplementary material
Source: PubMed Central journal article supplement (PMC4972256)
Supplement: supp_pp.15.00972_PP2015-00972R3_Supplemental_Material_Fig_3.pdf [file supp_pp.15.00972_PP2015-00972R3_Supplemental_Material_Fig_3.pdf]

## Starting the LobeFinder\_GUI

1. Click the "Open Folder" button to select folder where the ROI files are located.
2. Select checkbox(es) for output data type and/or figure format options.
3. Click "Run" button to start LobeFinder.

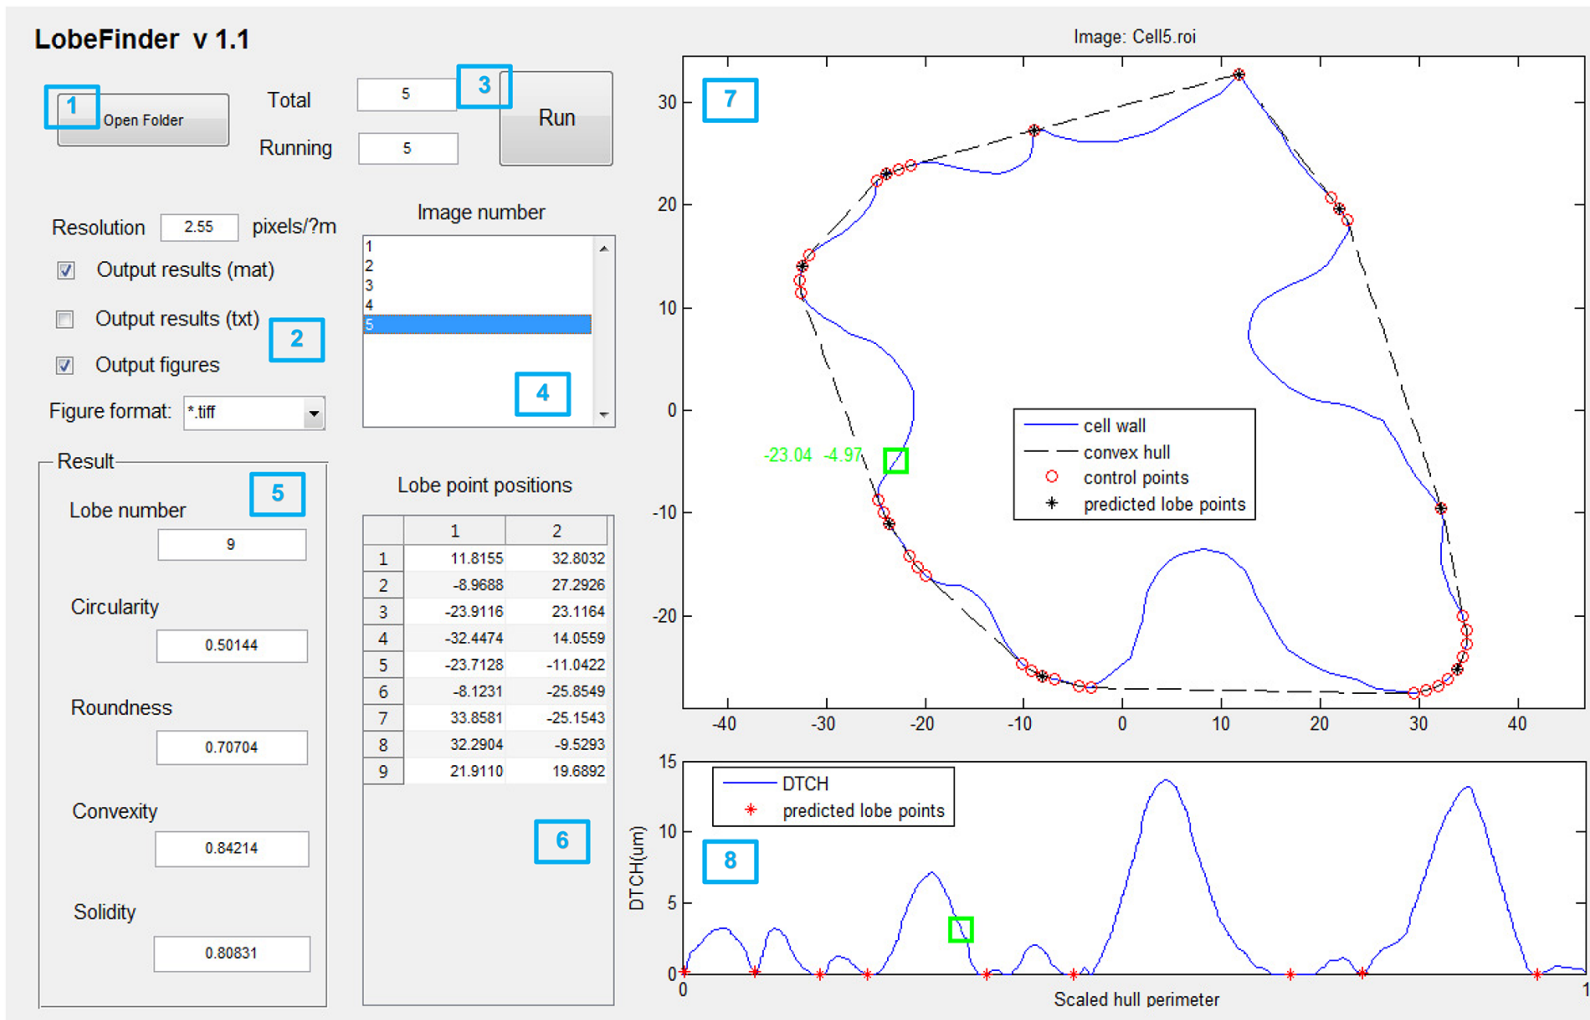

## Results of LobeFinder\_GUI

4. Select image ROI number in the box to display the LobeFinder result.
5. Predicted lobe numbers and Cell-shape descriptors.
6. Predicted lobe x-y coordinates.
7. Cell perimeter, convex hull, and predicted lobe point positions.
8. Corresponding distance to the convex hull with predicted lobe point locations on it.

**Supplemental Figure S3. Snapshot of the graphical user interface of LobeFinder. Operation steps and navigation of the results are outlined.**
